# Supplementary material
Source: PubMed Central journal article supplement (PMC3643758)
Supplement: supp_blood-2013-01-476614_blood-2013-01-476614-1.pdf [file supp_blood-2013-01-476614_blood-2013-01-476614-1.pdf]

**Appendix 1. Influence of baseline characteristics on total bacterial, Gram-positive and Gram-negative sterile site infections**

| Predictor           | Sterile Site Bacterial Infection during protocol therapy (N=612) |      |             |         | Gram-Positive Sterile Site Bacterial Infection (N=512) |             |         | Gram-Negative Sterile Site Bacterial Infection (N=78) |             |         |
|---------------------|------------------------------------------------------------------|------|-------------|---------|--------------------------------------------------------|-------------|---------|-------------------------------------------------------|-------------|---------|
|                     | N                                                                | IRR  | 95% CI      | P-value | IRR                                                    | 95% CI      | P-value | IRR                                                   | 95% CI      | P-value |
| <b>Demographics</b> |                                                                  |      |             |         |                                                        |             |         |                                                       |             |         |
| Age (years)         |                                                                  |      |             |         |                                                        |             |         |                                                       |             |         |
| 0-1                 | 180                                                              | 0.88 | 0.76 – 1.00 | 0.058   | 0.89                                                   | 0.75 – 1.06 | 0.200   | 1.14                                                  | 0.66 – 1.95 | 0.641   |
| 2-16                | 614                                                              | REF  |             |         | REF                                                    |             |         | REF                                                   |             |         |
| ≥17                 | 89                                                               | 1.01 | 0.86 – 1.19 | 0.897   | 0.85                                                   | 0.68 – 1.05 | 0.135   | 0.79                                                  | 0.36 – 1.72 | 0.546   |
| Race                |                                                                  |      |             |         |                                                        |             |         |                                                       |             |         |
| Caucasian           | 631                                                              | REF  |             |         | REF                                                    |             |         | REF                                                   |             |         |
| Asian               | 45                                                               | 0.94 | 0.74 – 1.19 | 0.587   | 0.94                                                   | 0.70 – 1.28 | 0.714   | 0.94                                                  | 0.34 – 2.59 | 0.905   |
| African American    | 103                                                              | 1.18 | 1.01 – 1.37 | 0.035   | 1.18                                                   | 0.98 – 1.43 | 0.089   | 1.16                                                  | 0.61 – 2.20 | 0.655   |
| Other/Unknown       | 104                                                              | 1.07 | 0.92 – 1.24 | 0.409   | 1.16                                                   | 0.96 – 1.39 | 0.122   | 0.86                                                  | 0.43 – 1.73 | 0.668   |
| Weight group*       |                                                                  |      |             |         |                                                        |             |         |                                                       |             |         |
| Underweight         | 64                                                               | 1.13 | 0.94 – 1.36 | 0.201   | 1.00                                                   | 0.78 – 1.28 | 0.991   | 0.91                                                  | 0.36 – 2.28 | 0.843   |
| Middleweight        | 576                                                              | REF  |             |         | REF                                                    |             |         | REF                                                   |             |         |
| Overweight          | 136                                                              | 1.27 | 1.12 – 1.45 | <0.001  | 1.26                                                   | 1.07 – 1.48 | 0.006   | 1.23                                                  | 0.69 – 2.18 | 0.483   |

\* See methods for details of weight group

Abbreviations: IRR, incidence rate ratio; CI, confidence interval; REF, reference

**Appendix 2. Influence of baseline characteristics on *Clostridium difficile* and sterile site fungal infections**

| Predictor           | <i>Clostridium difficile</i> Infection (N=123) |      |             |         | Sterile Site Fungal Infection (N=49) |             |         |
|---------------------|------------------------------------------------|------|-------------|---------|--------------------------------------|-------------|---------|
|                     | N                                              | IRR  | 95% CI      | P-value | IRR                                  | 95% CI      | P-value |
| <b>Demographics</b> |                                                |      |             |         |                                      |             |         |
| Age (years)         |                                                |      |             |         |                                      |             |         |
| 0-1                 | 180                                            | 0.60 | 0.37 – 0.96 | 0.035   | 1.08                                 | 0.52 – 2.25 | 0.839   |
| 2-16                | 614                                            | REF  |             |         | REF                                  |             |         |
| ≥17                 | 89                                             | 0.69 | 0.39 – 1.21 | 0.193   | 2.01                                 | 1.00 – 4.08 | 0.052   |
| Race                |                                                |      |             |         |                                      |             |         |
| Caucasian           | 631                                            | REF  |             |         | REF                                  |             |         |
| Asian               | 45                                             | 0.37 | 0.12 – 1.18 | 0.093   | 1.47                                 | 0.53 – 4.12 | 0.463   |
| African American    | 103                                            | 1.00 | 0.61 – 1.65 | 0.985   | 0.99                                 | 0.42 – 2.33 | 0.977   |
| Other/Unknown       | 104                                            | 1.32 | 0.86 – 2.01 | 0.207   | 0.60                                 | 0.21 – 1.67 | 0.325   |
| Weight group*       |                                                |      |             |         |                                      |             |         |
| Underweight         | 64                                             | 1.48 | 0.90 – 2.44 | 0.120   | 1.44                                 | 0.56 – 3.68 | 0.451   |
| Middleweight        | 576                                            | REF  |             |         | REF                                  |             |         |
| Overweight          | 136                                            | 0.89 | 0.57 – 1.38 | 0.598   | 1.42                                 | 0.72 – 2.81 | 0.315   |

\* See methods for details of weight group

Abbreviations: IRR, incidence rate ratio; CI, confidence interval; REF, reference

**Appendix 3. Influence of baseline characteristics on non-relapse related mortality (N=28)**

| <b>Predictor</b>    | <b>N</b> | <b>HR</b> | <b>95% CI</b> | <b>P-value</b> |
|---------------------|----------|-----------|---------------|----------------|
| <b>Demographics</b> |          |           |               |                |
| Age (years)         |          |           |               |                |
| 0-1                 | 180      | 1.08      | 0.40 – 2.91   | 0.876          |
| 2-16                | 614      | REF       |               |                |
| ≥17                 | 89       | 1.53      | 0.52 – 4.48   | 0.443          |
| Race                |          |           |               |                |
| Caucasian           | 631      | REF       |               |                |
| Asian               | 45       | 2.02      | 0.46 – 8.90   | 0.352          |
| African American    | 103      | 3.45      | 1.45 – 8.24   | 0.005          |
| Other/Unknown       | 104      | 1.54      | 0.51 – 4.69   | 0.446          |
| Weight group**      |          |           |               |                |
| Underweight         | 64       | 0.67      | 0.09 – 5.06   | 0.696          |
| Middleweight        | 576      | REF       |               |                |
| Overweight          | 136      | 2.16      | 0.92 – 5.11   | 0.078          |

\* Risk of any death during induction on or after day 10 of Induction 1 or death without relapse or progressive disease during intensification. Patients censored at conditioning for stem cell transplantation;

\*\* See methods for details of weight group

Abbreviations: HR, hazards ratio; CI, confidence interval; REF, reference
